# Supplementary material for: Strategies for Remodeling the Tumor Microenvironment Using Active Ingredients of Ginseng—A Promising Approach for Cancer Therapy
Source: Frontiers journal article supplement (doi:10.3389/fphar.2021.797634), 2021-12-22
Supplement: Data_Sheet_1.docx [file Data_Sheet_1.docx]

**TABLE 1** Effects of Ginsenosides on angiogenesis.

| **Components** | **Cell/animal model** | **Effects** | **Main mechanisms** | **Ref.** |
| --- | --- | --- | --- | --- |
| Ginsenoside Rg3 | *In vitro*, EPCs; *In vivo*, Lewis lung carcinoma (LLC) tumor-bearing murine model | Could suppress EPCs proliferation, migratory ability and tubular formation ability *in vitro*, and decrease number of peripheral EPCs and tumor capillary *in vivo* | Suppressing VEGF dependent p38 and ERK signal pathways | (23) |
| Ginsenoside Rg3 | *In vitro*, cord blood-derived CD34 stem/progenitor cells | Could attenuating EPC differentiation of human cord blood derived CD34-positive stem cells | Inhibiting VEGF dependent Akt/eNOS pathways | (24) |
| Ginsenoside Rg3 | *In vitro*, colorectal cancer cells(CRC) LoVo; *in vivo*, LoVo orthotopic xenograft murine model | Could decrease microvessel density (MVD) levels | Downregulating expression of several pro-angiogenic genes | (25) |
| Ginsenoside Rg3 | *In vitro*, gastric cancer cell line BGC823 | Could inhibit expression of VEGF | Downregulating expression of HIF-α | (26) |
| Ginsenoside Rg3 | *In vitro* and *in vivo*, a highly metastatic subline of murine B16 melanoma cells | Could decrease the number of vessels oriented toward the tumor lesions, and reduce vascular endothelial cell proliferation and migration | Downregulating expression of VEGF by inhibiting Akt and ERK pathways | (27) |
| Ginsenoside Rd | *In vitro*, HUVECs; *in vivo*, breast cancer cell line MDA-MB-231 mouse model | Could inhibit VEGF-dependent migration, vascularization  and viability and angiogenesis activity of HUVECs, and prevent tumor angiogenesis | Inhibiting expression of HIF-α and VEGF/VEGFR through Akt/mTOR/p70S6K signaling pathway | (30) |
| Ginsenoside Rk3 | *In vivo*, human NSCLC H460 xenograft mouse model, chick embryo chorioallantoic membrane (CAM) model | Could decrease the expression of endothelial cell marker CD34 in tumor tissues and inhibit angiogenetic activity in CAM model | Not clear | (135) |
| 20(S)-protopanaxadiol | *In vitro*, HUVECs | Could induce endoplasmic reticulum stress and apoptosis of HUVECs | Inducing PERK-eIF2-ATF4-CHOP signaling pathway. | (33) |
| Ginsenoside Rb1 | *In vitro*, HUVECs | Could suppressing the formation of endothelial tube-like structures | Increasing expression of PEDF via activating PPAR-γ/miR-33a pathway | (31) |
| Ginsenoside Ro and its metabolites | *In vitro*, HUVECs | Could inhibit tube formation of HUVECs. | Not clear | (32) |
| Ginsenoside F1 and Rh1 | *In vitro* and *in vivo*, HUVECs and human retinal microvascular endothelial cells (HRMECs) | Could inhibit VEGF-induced vascular leakage | Targeted suppressing NR4A1 expression and transcriptional activity | (37) |
